# Supplementary material
Source: HighWire-hosted journal article supplement (https://bmjopen.bmj.com/content/14/12/e081705)

**Figure 1. PRISMA Flow Diagram**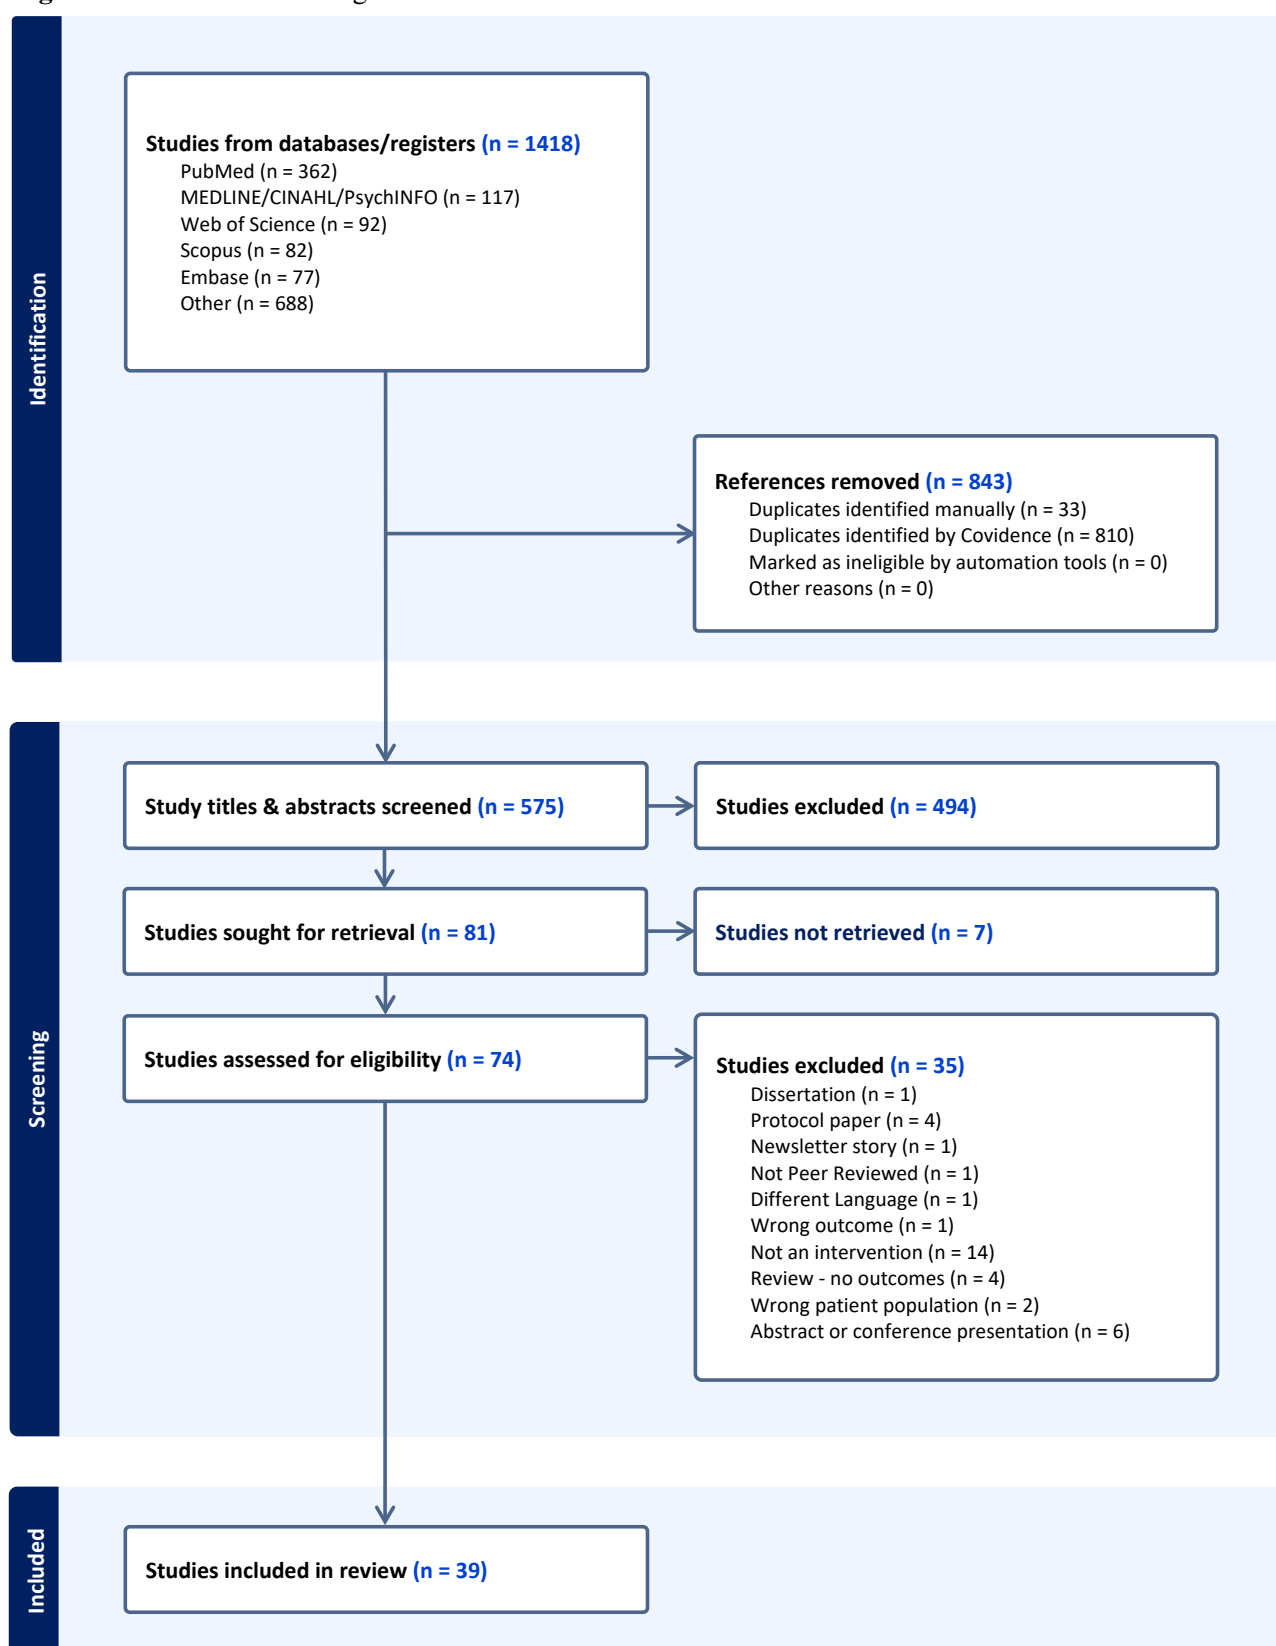

Supplement: inline-supplementary-material-1 [file inline-supplementary-material-1.pdf]
